# Supplementary material for: Enhancement of thermoelectric performance via weak disordering of topological crystalline insulators and band convergence by Se alloying in Pb0.5Sn0.5Te1 − xSex
Source: Royal Society of Chemistry journal article supplement (doi:10.1039/c8ta00381e), 2018-01-01
Supplement: c8ta00381e1.pdf [file c8ta00381e1.pdf]

## Supporting Information

### Enhancement of Thermoelectric Performance via Weak Disorder of Topological Crystalline Insulator and Band Convergence by Se Alloying in $\text{Pb}_{0.5}\text{Sn}_{0.5}\text{Te}_{1-x}\text{Se}_x$ Compounds

*Dianta Ginting<sup>a</sup>, Chan-Chieh Lin<sup>a</sup>, Ga Reoung Kim<sup>a</sup>, Jae Hyun Yun<sup>a</sup>, Byung-Kyu Yu<sup>b</sup>, Sung-Jin Kim<sup>b</sup>, Kyunghan Ahn<sup>a\*</sup>, and Jong-Soo Rhyee<sup>a\*</sup>*

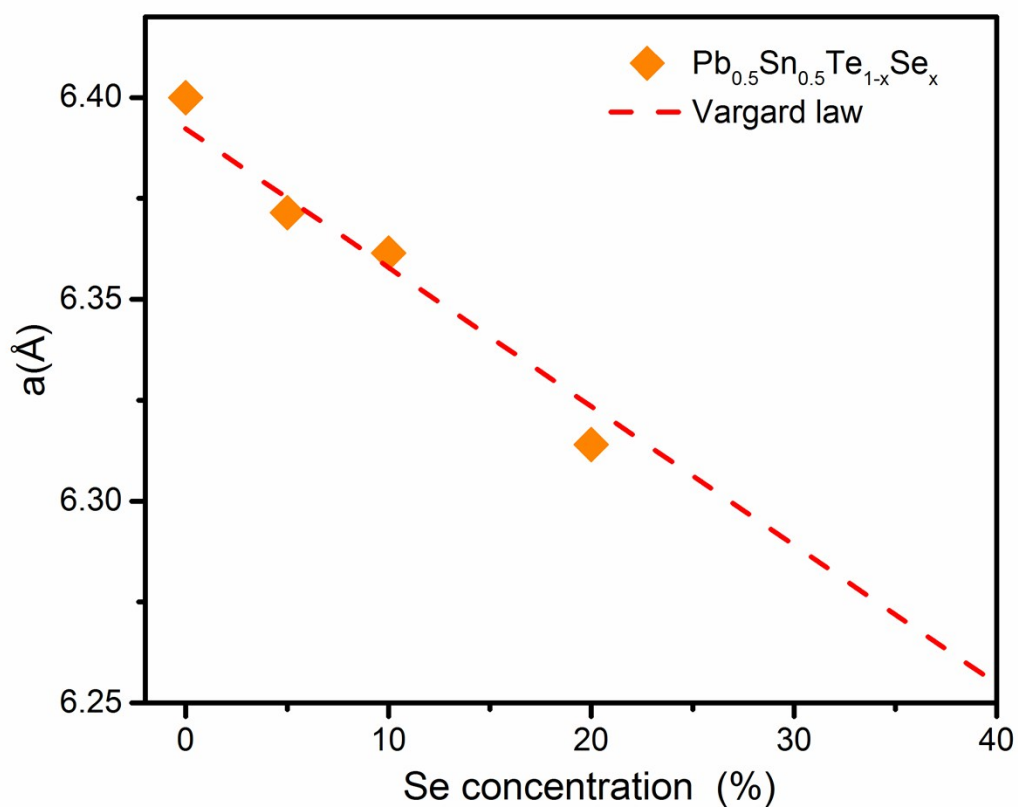

**Figure S1:** The lattice parameter content against Se content of Se and Vargard law

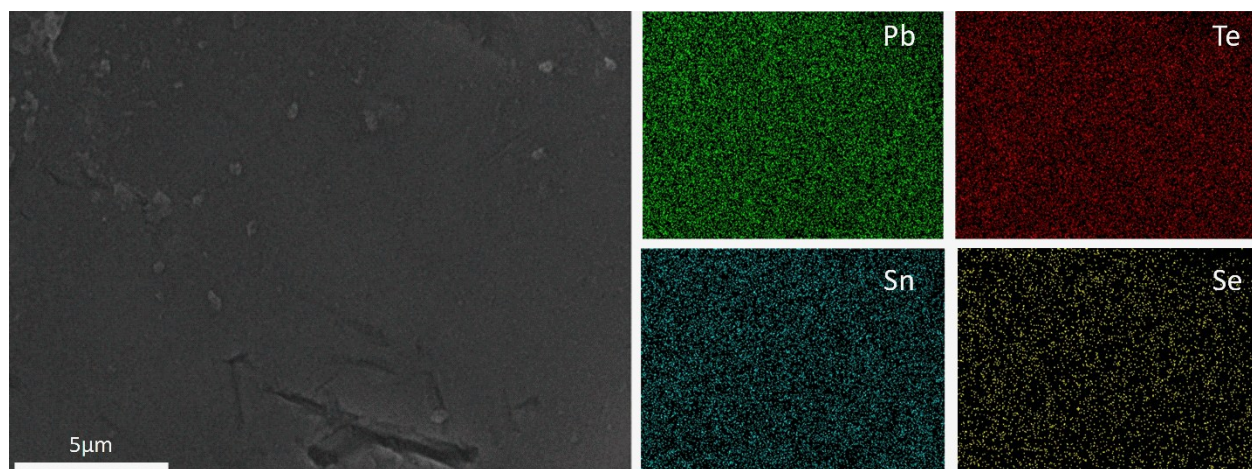

**Figure S2.** The SEM image of  $\text{Pb}_{0.5}\text{Sn}_{0.5}\text{Te}_{0.95}\text{Se}_{0.05}$  and its SEM-EDS elemental maps of Pb, Sn, Te, and Se.

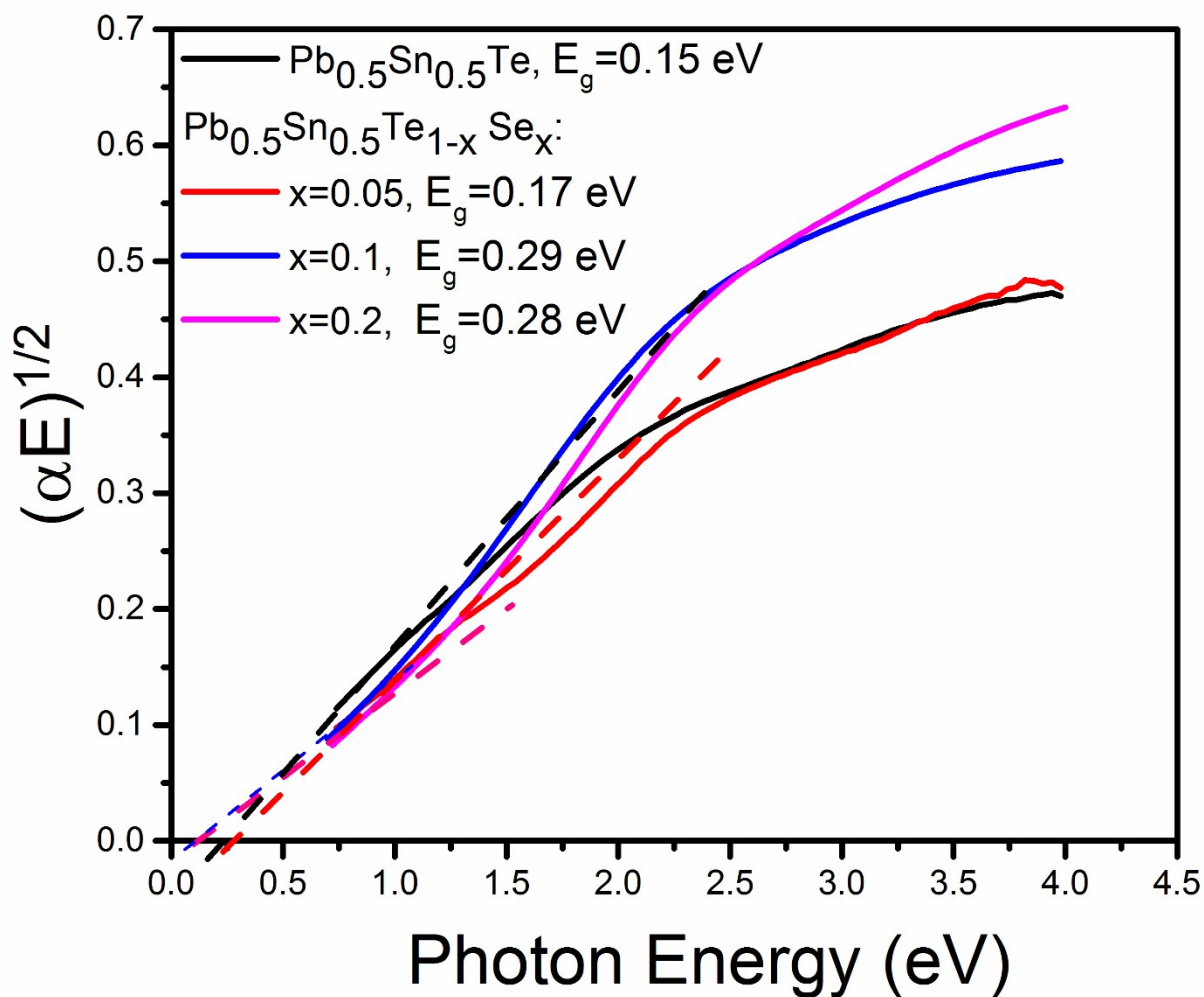

**Figure S3:** Band gap at room temperature for  $x=0.00$ ,  $0.05$ ,  $0.1$ , and  $0.2$

(a)

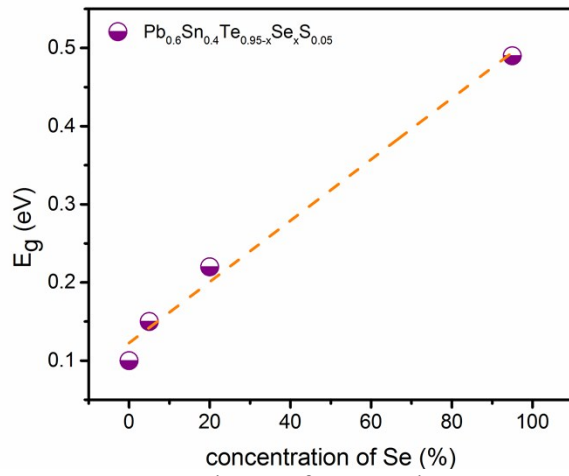

(b)

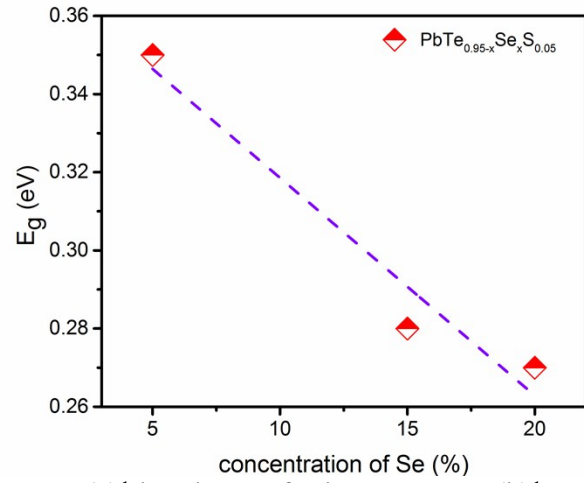

**Figure S4 :** Band gap of TCIs  $\text{Pb}_{0.6}\text{Sn}_{0.4}\text{Te}_{0.95-x}\text{Se}_x\text{S}_{0.05}$  (a)<sup>1</sup> band gap of  $\text{PbTe}_{0.95-x}\text{Se}_x\text{S}_{0.05}$  (b)<sup>1</sup>

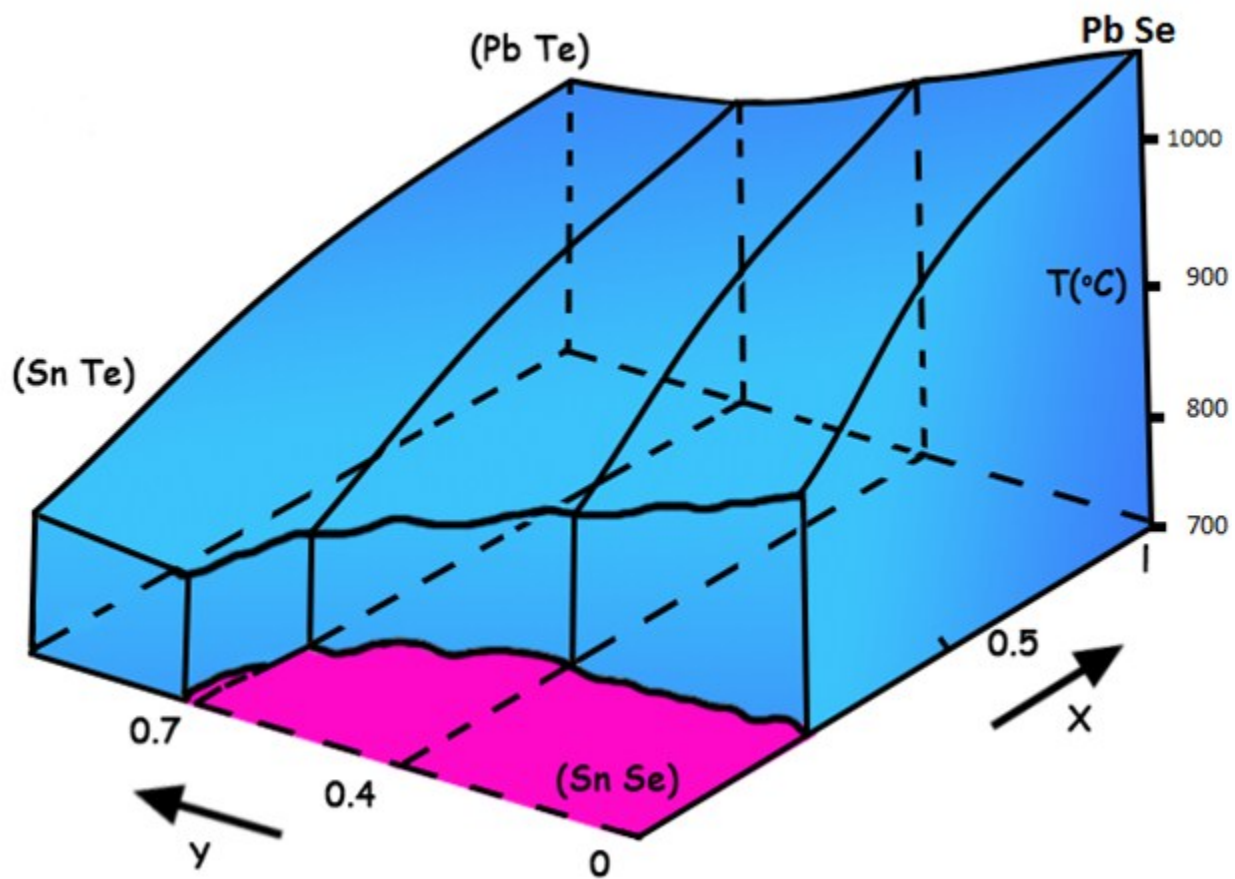

**Figure S5:** Three-dimensional representation of the liquidus surface of the stoichiometric system of  $\text{Pb}_z\text{Sn}_{1-z}\text{Te}_y\text{Se}_{1-y}$  from reference<sup>2</sup>

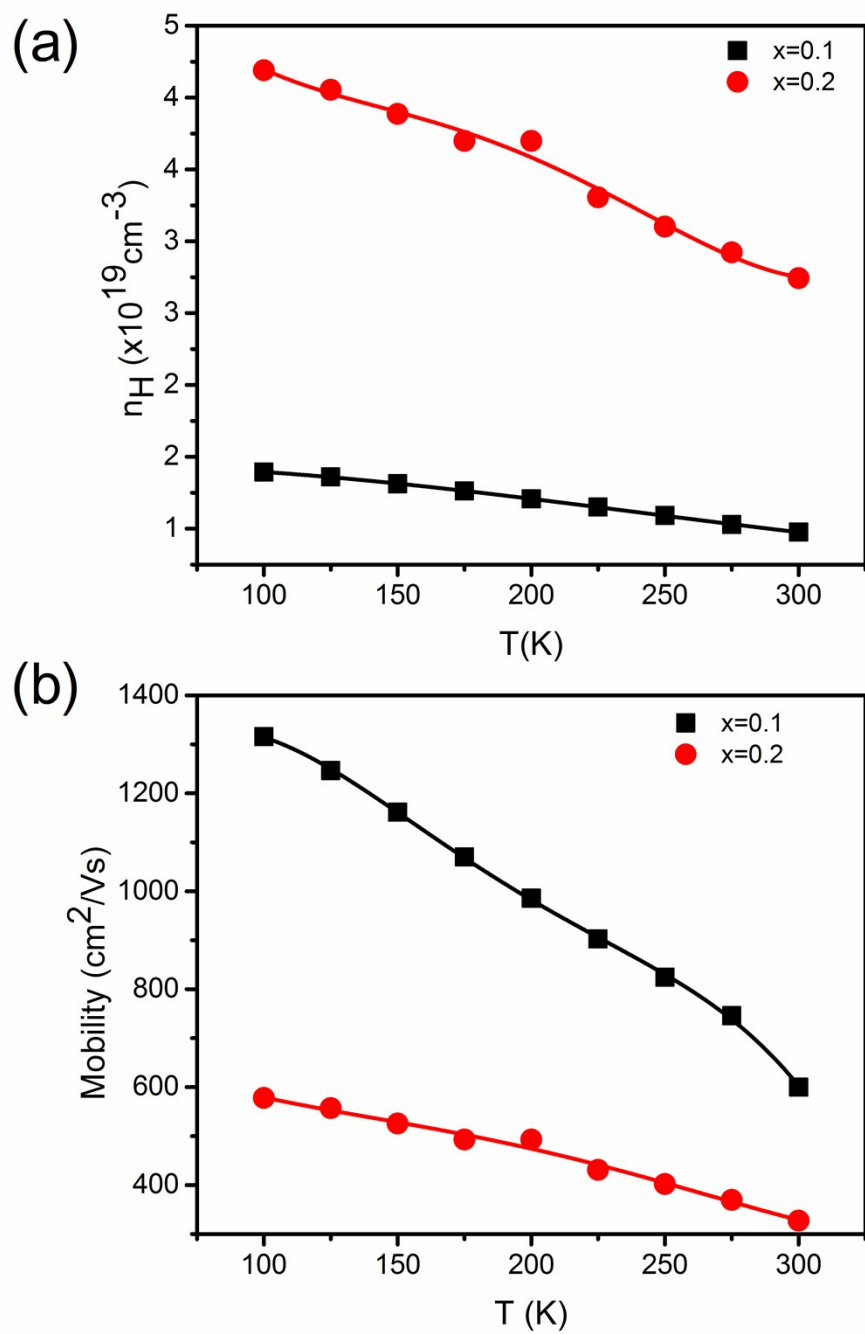

**Figure S6:** hall carrier concentration and mobility for  $x=0.1$  and  $0.2$  at 200K-300K

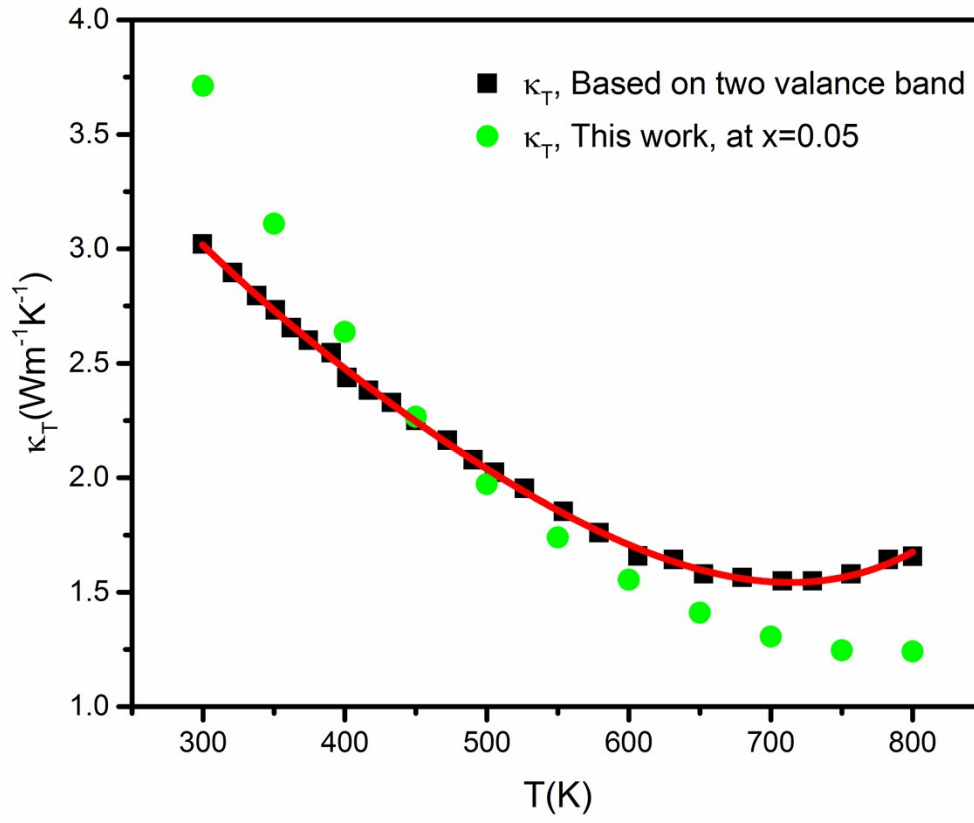

**Figure S7:** Two band total thermal conductivity of  $\text{Pb}_{0.5}\text{Sn}_{0.5}\text{Te}$  from reference<sup>3</sup> with this work at  $x=0.05$

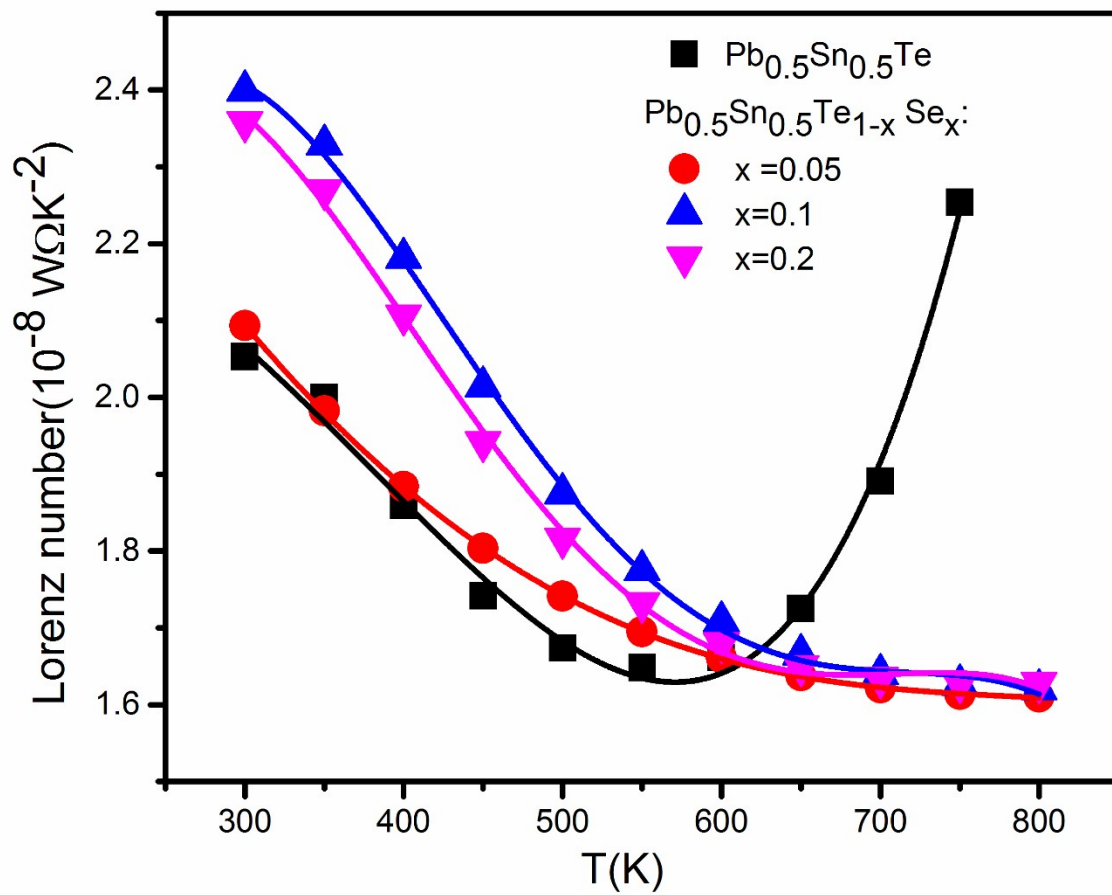

**Figure S8.** Temperature-dependent Lorenz number for  $\text{Pb}_{0.5}\text{Sn}_{0.5}\text{Te}_{1-x}\text{Se}_x$  ( $x = 0.0, 0.05, 0.1$ , and  $0.2$ ) compounds obtained from the single parabolic band model (see text).



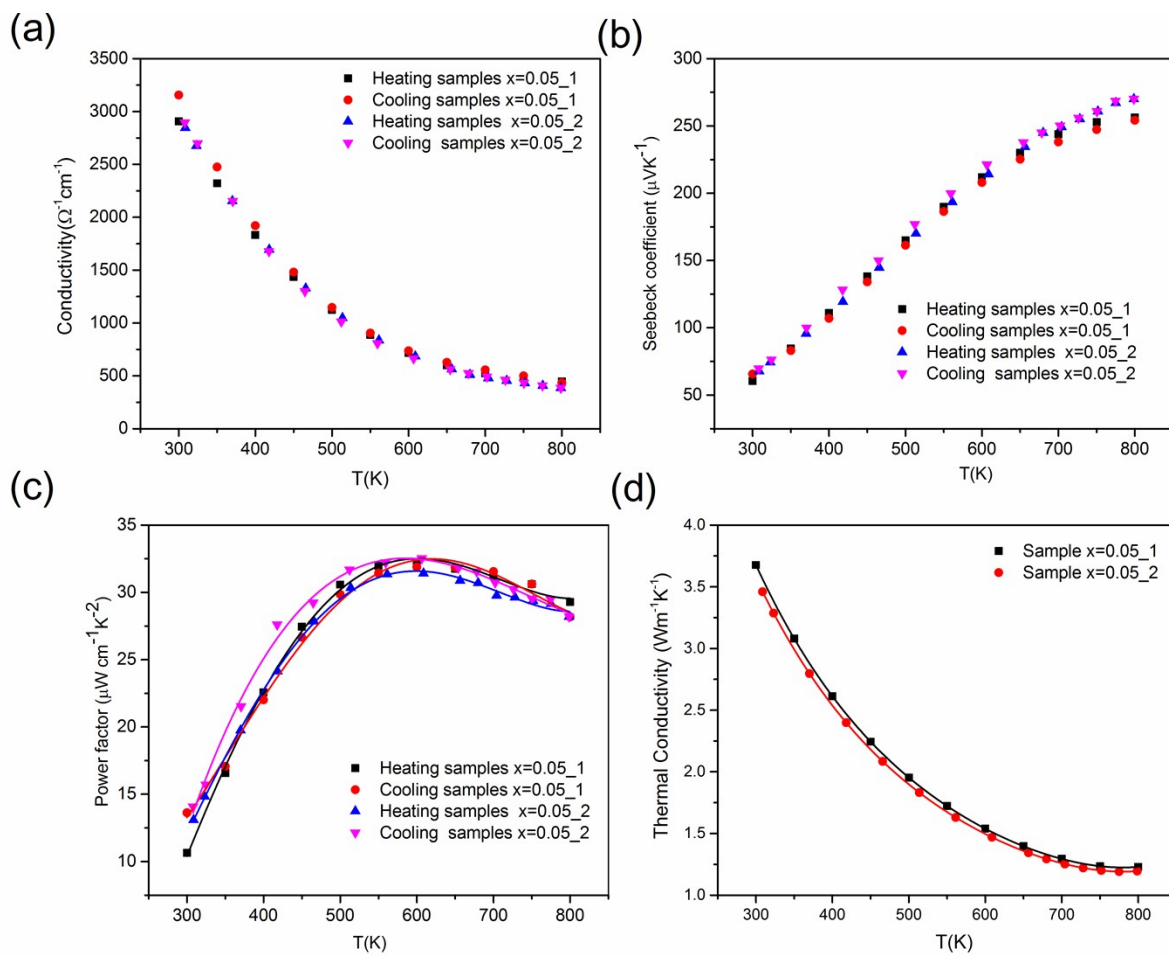

**Figure S9.** Reproducible measurements of the  $\text{Pb}_{0.5}\text{Sn}_{0.5}\text{Te}_{1-x}\text{Se}_x$  ( $x = 0.05$ ) compound for different samples with heat cycling. It shows reasonable reproducibility of the sample.

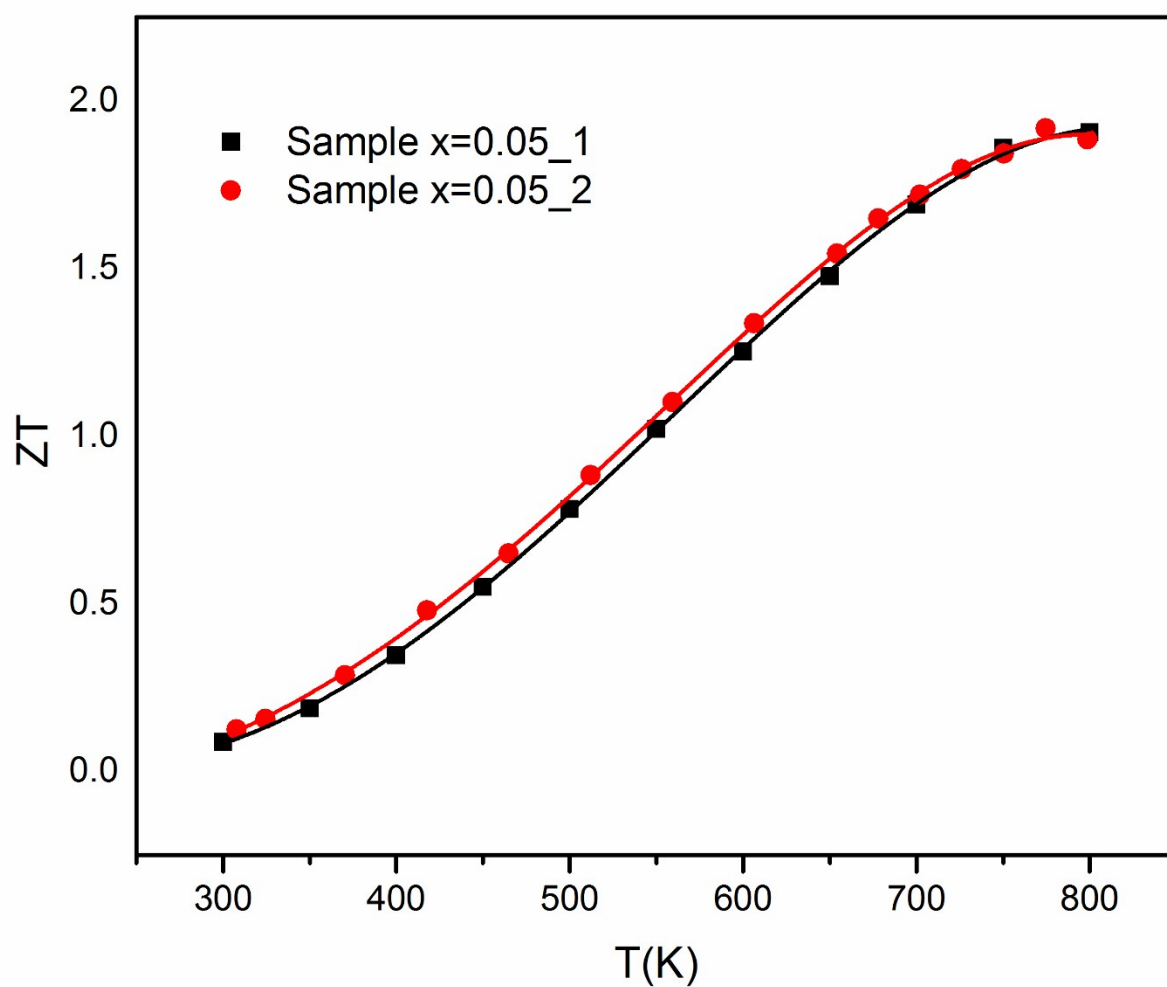

**Figure S10.** Reproducibility of the temperature-dependent  $ZT$  value for  $\text{Pb}_{0.5}\text{Sn}_{0.5}\text{Te}_{1-x}\text{Se}_x$  ( $x = 0.05$ ) compound.

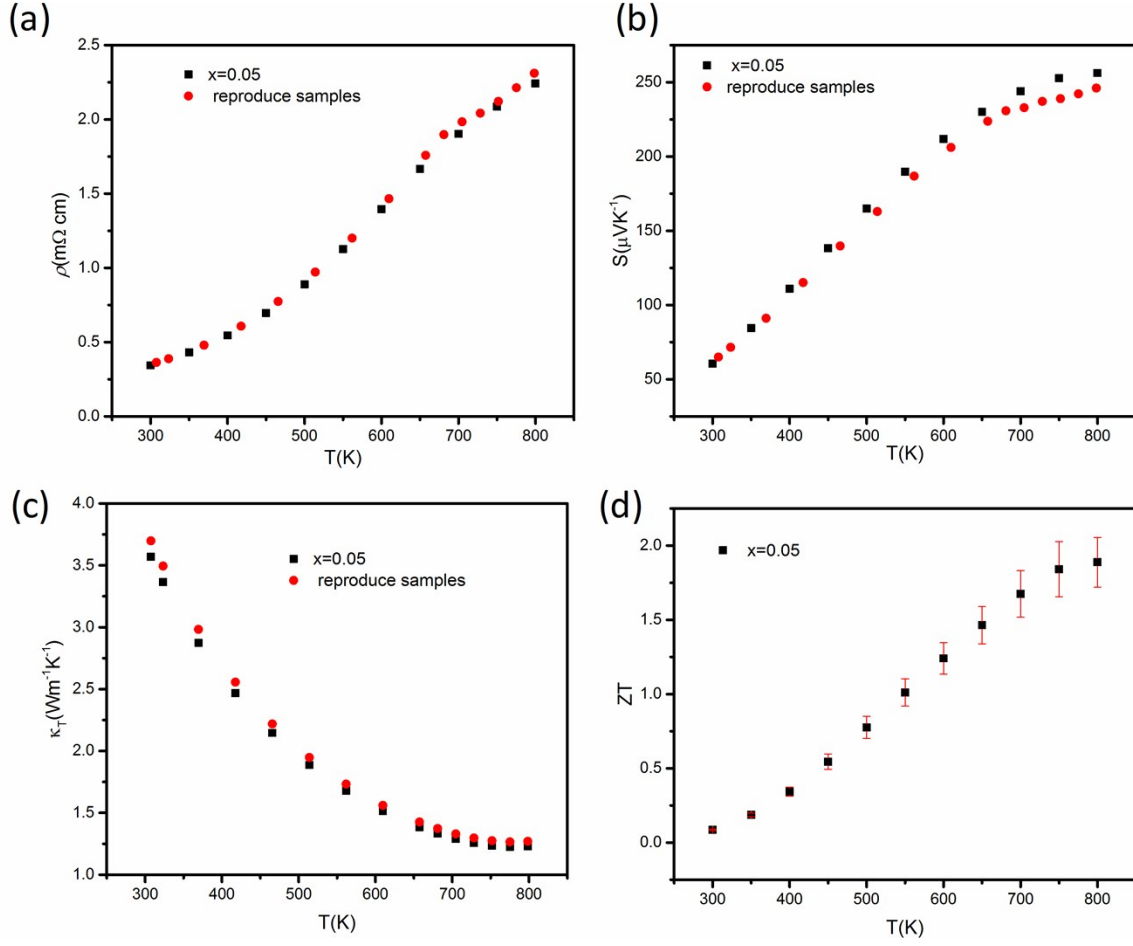

**Figure S11.** Reproducible measurements of the  $\text{Pb}_{0.5}\text{Sn}_{0.5}\text{Te}_{1-x}\text{Se}_x$  ( $x = 0.05$ ) compound for different batch: electric resistivity (a), Seebeck coefficient (b), thermal conductivity (c), temperature-dependent  $ZT$  value for  $\text{Pb}_{0.5}\text{Sn}_{0.5}\text{Te}_{1-x}\text{Se}_x$  ( $x = 0.05$ ) compound with error bar from reproducibility samples with different batch (d).

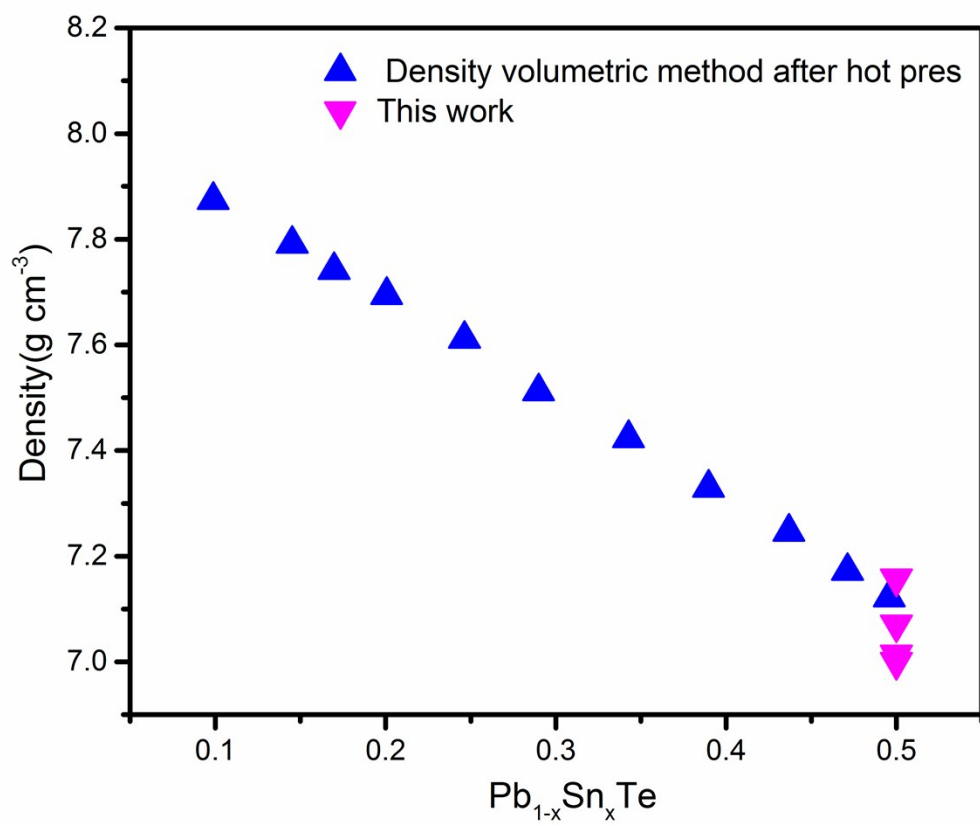

**Figure 12:** Density volumetric method after hot press for  $\text{Pb}_{1-x}\text{Sn}_x\text{Te}$  from reference<sup>4</sup> with density this work by Archimedes method

**Table S1. Density Volumetric of  $\text{Pb}_{1-x}\text{Sn}_x\text{Te}^4$  and density  $\text{Pb}_{0.5}\text{Sn}_{0.5}\text{Te}_{1-x}\text{Se}_x$  by Archimedes method.**

| $\text{Pb}_{1-x}\text{Sn}_x\text{Te}$ | Density volumetric | $\text{Pb}_{0.5}\text{Sn}_{0.5}\text{Te}_{1-x}\text{Se}_x$ | Density by Archimedes method |
|---------------------------------------|--------------------|------------------------------------------------------------|------------------------------|
| 0.2                                   | 7.68               | 0                                                          | 7.014                        |
| 0.3                                   | 7.486              | 0.05                                                       | 7                            |
| 0.4                                   | 7.298              | 0.1                                                        | 7.071                        |
| 0.5                                   | 7.112              | 0.2                                                        | 7.158                        |

**Table S1. Theoretical density  $D_T$ , experimental density  $D_{\text{exp}}$ , relative density  $D_R$ , heat**

| x    | $D_t$ (g cm <sup>-3</sup> ) | $D_{\text{exp}}$ (g cm <sup>-3</sup> ) | $D_R(\%)$ | $C_p$ (Jg <sup>-1</sup> K <sup>-1</sup> ) | $\lambda$ (mm <sup>2</sup> s <sup>-1</sup> ) |
|------|-----------------------------|----------------------------------------|-----------|-------------------------------------------|----------------------------------------------|
| 0    | 7.100(Gelbstein, 2007 #460) | 7014                                   | 98.7      | 0.1757                                    | 1.7328                                       |
| 0.05 | 7.150                       | 7.000                                  | 97.90     | 0.1758                                    | 3.0496                                       |
| 0.1  | 7.200                       | 7.071                                  | 98.20     | 0.1759                                    | 1.0190                                       |
| 0.2  | 7.300                       | 7.158                                  | 98.05     | 0.1762                                    | 1.0603                                       |

**capacity, and thermal diffusivity  $\lambda$  at room temperature.**

#### Reference:

1. C. C. L. D. Ginting, L. Rathnam, G. Kim, J. H. Yun, H. S. So, H. Lee, B. Kyu Yu, S.-J. Kim, K. Ahn, and J-S Rhyee, *submitted*, 2018.
2. C. A. Kennedy and K. J. Linden, *Journal of Applied Physics*, 1970, **41**, 252-253.
3. Y. Gelbstein, Z. Dashevsky and M. P. Dariel, *Physica B: Condensed Matter*, 2007, **391**, 256-265.
4. Y. Gelbstein, Z. Dashevsky, Y. George and M. P. Dariel, 2006.
